# Supplementary material for: Short Time-Series Expression Transcriptome Data Reveal the Gene Expression Patterns of Dairy Cow Mammary Gland as Milk Yield Decreased Process
Source: MDPI journal article supplement (doi:10.3390/genes12060942), 2021-06-20
Supplement: s1 [file s1]

Table S11. Significantly enriched gene ontology (GO) terms related to cell apoptosis and proliferation during peak and late lactation.

| Category           | ID         | Term                                                                                      | P-value | Gene Name                                                                                                                                                                                                                                                                                                                                                                                                                                                                                    | Number of Genes |
|--------------------|------------|-------------------------------------------------------------------------------------------|---------|----------------------------------------------------------------------------------------------------------------------------------------------------------------------------------------------------------------------------------------------------------------------------------------------------------------------------------------------------------------------------------------------------------------------------------------------------------------------------------------------|-----------------|
| biological process | GO:0010942 | positive regulation of cell death                                                         | < 0.001 | <i>S100A9, IL6, MMP9, TGFB2, C1QBP, PPID, PYCARD, CD40, RNF183, TNF, SCIN, S100A8, PDIA3, ZC3H12A, CCL3, RAPGEF2, TP53, CCL5, F2R, SHQ1, ITM2C, CCL2, C1QA, PPIF, MAPT, FAP, PLAUR, MYC, CLU, PPARG</i>                                                                                                                                                                                                                                                                                      | 30              |
| biological process | GO:0043065 | positive regulation of apoptotic process                                                  | < 0.001 | <i>S100A9, IL6, MMP9, TGFB2, C1QBP, PPID, PYCARD, CD40, RNF183, TNF, SCIN, S100A8, PDIA3, ZC3H12A, CCL3, RAPGEF2, TP53, CCL5, F2R, SHQ1, ITM2C, CCL2, PPIF, FAP, PLAUR, MYC, CLU, PPARG</i>                                                                                                                                                                                                                                                                                                  | 28              |
| biological process | GO:0043068 | positive regulation of programmed cell death                                              | < 0.001 | <i>S100A9, IL6, MMP9, TGFB2, C1QBP, PPID, PYCARD, CD40, RNF183, TNF, SCIN, S100A8, PDIA3, ZC3H12A, CCL3, RAPGEF2, TP53, CCL5, F2R, SHQ1, ITM2C, CCL2, PPIF, FAP, PLAUR, MYC, CLU, PPARG</i>                                                                                                                                                                                                                                                                                                  | 28              |
| biological process | GO:0010941 | regulation of cell death                                                                  | 0.001   | <i>S100A9, NOC2L, IL6, MMP9, HSP90AB1, TNFAIP8L2, BCL2A1, DNMT1, TGFB2, C1QBP, PPID, ANGPTL4, PYCARD, CD40, SOCS3, RSL1D1, RNF183, TNF, SCIN, S100A8, PDIA3, ZC3H12A, ANGPT1, CCL3, RAPGEF2, HSP90B1, GPR37L1, TXN, APEX1, TP53, CCL5, F2R, SHQ1, ITM2C, FCER1G, PSMG2, CCL2, C1QA, PPIF, CITED2, MAPT, FAP, PLAUR, MYC, SLC25A5, TNFAIP8L1, LTF, CL2L15, CLU, PPARG</i>                                                                                                                     | 50              |
| biological process | GO:0008219 | cell death                                                                                | 0.001   | <i>S100A9, NOC2L, IL6, MMP9, CASP4, HSP90AB1, TNFAIP8L2, BCL2A1, GABARAP, DNMT1, IFI27L2, TGFB2, C1QBP, CDCA7, PPID, ANGPTL4, ETV6, CHI3L1, THEM4, PYCARD, CD40, SOCS3, XAF1, RSL1D1, RNF183, TNF, SCIN, S100A8, PDIA3, PDCL3, ZC3H12A, ANGPT1, CCL3, RAPGEF2, HSP90B1, GPR37L1, TXN, APEX1, HMOX1, CDIP1, TP53, CCL5, S100A14, F2R, SHQ1, ITM2C, FCER1G, PMP22, PSMG2, CCL2, C1QA, PPIF, CITED2, MAPT, FAP, EYA2, PLAUR, MYC, SLC25A5, TNFAIP8L1, CIDEC, IRF1, LTF, BCL2L15, CLU, PPARG</i> | 66              |
| biological process | GO:0042981 | regulation of apoptotic process                                                           | 0.002   | <i>S100A9, NOC2L, IL6, MMP9, HSP90AB1, TNFAIP8L2, BCL2A1, DNMT1, TGFB2, C1QBP, PPID, ANGPTL4, PYCARD, CD40, SOCS3, RSL1D1, RNF183, TNF, SCIN, S100A8, PDIA3, ZC3H12A, ANGPT1, CCL3, RAPGEF2, HSP90B1, APEX1, TP53, CCL5, F2R, SHQ1, ITM2C, FCER1G, PSMG2, CCL2, PPIF, CITED2, FAP, PLAUR, MYC, SLC25A5, TNFAIP8L1, LTF, BCL2L15, CLU, PPARG</i>                                                                                                                                              | 46              |
| biological process | GO:0006915 | apoptotic process                                                                         | 0.002   | <i>S100A9, NOC2L, IL6, MMP9, CASP4, HSP90AB1, TNFAIP8L2, BCL2A1, GABARAP, DNMT1, IFI27L2, TGFB2, C1QBP, CDCA7, PPID, ANGPTL4, ETV6, CHI3L1, THEM4, PYCARD, CD40, SOCS3, XAF1, RSL1D1, RNF183, TNF, SCIN, S100A8, PDIA3, PDCL3, ZC3H12A, ANGPT1, CCL3, RAPGEF2, HSP90B1, APEX1, HMOX1, CDIP1, TP53, CCL5, S100A14, F2R, SHQ1, ITM2C, FCER1G, PSMG2, CCL2, PPIF, CITED2, FAP, EYA2, PLAUR, MYC, SLC25A5, TNFAIP8L1, CIDEC, IRF1, LTF, BCL2L15, CLU, PPARG</i>                                  | 61              |
| biological process | GO:0012501 | programmed cell death                                                                     | 0.004   | <i>S100A9, NOC2L, IL6, MMP9, CASP4, HSP90AB1, TNFAIP8L2, BCL2A1, GABARAP, DNMT1, IFI27L2, TGFB2, C1QBP, CDCA7, PPID, ANGPTL4, ETV6, CHI3L1, THEM4, PYCARD, CD40, SOCS3, XAF1, RSL1D1, RNF183, TNF, SCIN, S100A8, PDIA3, PDCL3, ZC3H12A, ANGPT1, CCL3, RAPGEF2, HSP90B1, APEX1, HMOX1, CDIP1, TP53, CCL5, S100A14, F2R, SHQ1, ITM2C, FCER1G, PSMG2, CCL2, PPIF, CITED2, FAP, EYA2, PLAUR, MYC, SLC25A5, TNFAIP8L1, CIDEC, IRF1, LTF, BCL2L15, CLU, PPARG</i>                                  | 61              |
| biological process | GO:0008285 | negative regulation of cell proliferation                                                 | 0.007   | <i>TGFB2, TNF, SCIN, WDR77, RAPGEF2, CD9, TP53, F2R, SERPINF1, DDAH1, CCL2, KRT5, FAP, ENPP3, CAMK2N1, IRF1, CNN1, PTN, PPARG, APOD</i>                                                                                                                                                                                                                                                                                                                                                      | 20              |
| biological process | GO:0043280 | positive regulation of cysteine-type endopeptidase activity involved in apoptotic process | 0.009   | <i>S100A9, PYCARD, TNF, S100A8, F2R, MYC, PPARG</i>                                                                                                                                                                                                                                                                                                                                                                                                                                          | 7               |
| biological process | GO:1904035 | regulation of epithelial cell apoptotic process                                           | 0.009   | <i>ANGPTL4, CD40, TNF, ANGPT1, CCL2</i>                                                                                                                                                                                                                                                                                                                                                                                                                                                      | 5               |

|                    |            |                                                      |       |                                                                                                                                                                                                                                                                                                                                                                               |    |
|--------------------|------------|------------------------------------------------------|-------|-------------------------------------------------------------------------------------------------------------------------------------------------------------------------------------------------------------------------------------------------------------------------------------------------------------------------------------------------------------------------------|----|
| biological process | GO:1904019 | epithelial cell apoptotic process                    | 0.013 | ANGPTL4, CD40, TNF, ANGPT1, CCL2                                                                                                                                                                                                                                                                                                                                              | 5  |
| biological process | GO:0050680 | negative regulation of epithelial cell proliferation | 0.018 | TGFB2, TNF, WDR77, SERPINF1, CCL2, KRT5, PPARG                                                                                                                                                                                                                                                                                                                                | 7  |
| biological process | GO:0008283 | cell proliferation                                   | 0.003 | IL6, MMP9, SERPINF2, IMPDH2, DNMT1, TSPAN1, TGFB2, CDCA7, NDRG1, ETV6, PYCARD, IL18, CD40, THBS4, TNF, SCIN, IL34, ANGPT1, WDR12, WDR77, RAPGEF2, CD9, GPR37L1, GNG5, MARCKSL1, CKS2, TP53, CCL5, JUNB, F2R, IGFBP2, SERPINF1, DDAH1, CNN2, TGFB1, CCL2, PRDX1, KRT5, FAP, FGL1, MYC, F2RL1, ENPP3, SLC25A5, CAMK2N1, PPP1R16B, IRF1, LTF, S1PR1, CNN1, CLU, PTN, PPARG, APOD | 54 |
| biological process | GO:0042127 | regulation of cell proliferation                     | 0.004 | IL6, MMP9, SERPINF2, DNMT1, TGFB2, CDCA7, NDRG1, PYCARD, IL18, CD40, THBS4, TNF, SCIN, IL34, ANGPT1, WDR77, RAPGEF2, CD9, GPR37L1, GNG5, MARCKSL1, TP53, CCL5, F2R, IGFBP2, SERPINF1, DDAH1, CNN2, CCL2, KRT5, FAP, MYC, ENPP3, SLC25A5, CAMK2N1, PPP1R16B, IRF1, LTF, S1PR1, CNN1, CLU, PTN, PPARG, APOD                                                                     | 44 |
| biological process | GO:0008284 | positive regulation of cell proliferation            | 0.037 | IL6, MMP9, SERPINF2, DNMT1, TGFB2, PYCARD, IL18, CD40, THBS4, TNF, IL34, WDR77, GPR37L1, GNG5, MARCKSL1, CCL5, F2R, IGFBP2, MYC, SLC25A5, PPP1R16B, LTF, S1PR1, PTN                                                                                                                                                                                                           | 24 |
| biological process | GO:0050678 | regulation of epithelial cell proliferation          | 0.049 | TGFB2, THBS4, TNF, WDR77, CCL5, SERPINF1, CCL2, KRT5, MYC, PPP1R16B, PTN, PPARG                                                                                                                                                                                                                                                                                               | 12 |
