# Supplementary material for: Short Time-Series Expression Transcriptome Data Reveal the Gene Expression Patterns of Dairy Cow Mammary Gland as Milk Yield Decreased Process
Source: MDPI journal article supplement (doi:10.3390/genes12060942), 2021-06-20
Supplement: s1 [file s1]

**Table S6.** Key significantly enriched gene ontology (GO) terms in profile 15.

| <b>ID</b>  | <b>Term</b>                                                        | <b>FDR</b> | <b>Gene Name</b>                                                                                                                     | <b>Number of Genes</b> |
|------------|--------------------------------------------------------------------|------------|--------------------------------------------------------------------------------------------------------------------------------------|------------------------|
| GO:0010941 | regulation of cell death                                           | 0.004      | <i>CCL2, CCL3, DNMT1, FCER1G, JUNB, LTF, NUP93, PHB2, PPID, RSL1D1, SCIN, TNF, TP53</i>                                              | 13                     |
| GO:0051253 | negative regulation of RNA metabolic process                       | 0.006      | <i>BHLHE40, DNMT1, IRF1, JUNB, KCTD1, PHB2, PPID, PRMT5, TNF, TP53</i>                                                               | 10                     |
| GO:2000113 | negative regulation of cellular macromolecule biosynthetic process | 0.006      | <i>BHLHE40, DNMT1, EIF6, IRF1, JUNB, KCTD1, PHB2, PPID, TNF, TP53</i>                                                                | 10                     |
| GO:0045892 | negative regulation of transcription                               | 0.008      | <i>BHLHE40, DNMT1, IRF1, JUNB, KCTD1, PHB2, PPID, TNF, TP53</i>                                                                      | 9                      |
| GO:0042981 | regulation of apoptotic process                                    | 0.014      | <i>CCL2, CCL3, DNMT1, FCER1G, LTF, PHB2, PPID, RSL1D1, SCIN, TNF, TP53</i>                                                           | 11                     |
| GO:0008285 | negative regulation of cell population proliferation               | 0.025      | <i>CCL2, IRF1, PHB2, SCIN, TNF, TP53</i>                                                                                             | 6                      |
| GO:1902806 | regulation of cell cycle G1/S phase transition                     | 0.026      | <i>CCL2, PHB2, TP53</i>                                                                                                              | 3                      |
| GO:0031324 | negative regulation of cellular metabolic process                  | 0.028      | <i>BHLHE40, DNMT1, EIF6, IRF1, JUNB, KCTD1, LTF, PHB2, PPID, PRMT5, SERPINB1, TNF, TP53</i>                                          | 13                     |
| GO:0000291 | nuclear-transcribed mRNA catabolic process                         | 0.033      | <i>EXOSC4, POLR2G</i>                                                                                                                | 2                      |
| GO:0048523 | negative regulation of cellular process                            | 0.033      | <i>BHLHE40, CCL2, CCL3, DNMT1, EIF6, FCER1G, GPR171, IRF1, JUNB, KCTD1, LTF, NUP93, PHB2, PPID, PRMT5, SCIN, SERPINB1, TNF, TP53</i> | 19                     |
| GO:0000122 | negative regulation of transcription by RNA polymerase II          | 0.034      | <i>BHLHE40, DNMT1, JUNB, PPID, TNF, TP53</i>                                                                                         | 6                      |
| GO:0050680 | negative regulation of epithelial cell proliferation               | 0.036      | <i>CCL2, PHB2, TNF</i>                                                                                                               | 3                      |
| GO:2000134 | negative regulation of G1/S transition of mitotic cell cycle       | 0.040      | <i>CCL2, TP53</i>                                                                                                                    | 2                      |
| GO:0006974 | cellular response to DNA damage stimulus                           | 0.036      | <i>KIAA0101, KIF22, MND1, POLD1, RUVBL2, TNF, TP53</i>                                                                               | 7                      |
