# Supplementary material for: Short Time-Series Expression Transcriptome Data Reveal the Gene Expression Patterns of Dairy Cow Mammary Gland as Milk Yield Decreased Process
Source: MDPI journal article supplement (doi:10.3390/genes12060942), 2021-06-20
Supplement: s1 [file s1]

Table S9. Significantly enriched gene ontology (GO) terms related to cell proliferation and apoptotic during peak and mid lactation.

| Category           | ID         | Term                                         | P-value | Gene Name                                                                                                                                                                                                                                                                                   | Number of Genes |
|--------------------|------------|----------------------------------------------|---------|---------------------------------------------------------------------------------------------------------------------------------------------------------------------------------------------------------------------------------------------------------------------------------------------|-----------------|
| biological process | GO:0042127 | regulation of cell proliferation             | < 0.001 | PYCARD, MUSTN1, MMP9, CAV2, CORO1A, KITLG, CDCA7, PPARG, MEF2C, TNF, IL34, MSX2, EGR1, THBS4, IL18, S1PR1, CXCL10, FAP, DDAH1, RAC2, NDRG1, F2R, PPP1R16B, NFIB, PIM1, CCL5, SCIN, CNN1, CD320, TP53, GPR37L1, FABP4, MYC, CLU, ADIPOQ, CCL2, EPCAM, B4GALT1, LTF                           | 39              |
| biological process | GO:0008283 | cell proliferation                           | < 0.001 | PYCARD, MUSTN1, MMP9, CAV2, TSPAN1, CORO1A, KITLG, TEK, CDCA7, PPARG, MEF2C, TNF, IL34, MSX2, EGR1, THBS4, TGFB1, IL18, S1PR1, CXCL10, FAP, CKS2, DDAH1, RAC2, NDRG1, F2R, PPP1R16B, NFIB, PIM1, CCL5, SCIN, CNN1, CD320, TP53, GPR37L1, FABP4, MYC, CLU, ADIPOQ, CCL2, EPCAM, B4GALT1, LTF | 43              |
| biological process | GO:0008284 | positive regulation of cell proliferation    | < 0.001 | PYCARD, MUSTN1, MMP9, CAV2, CORO1A, KITLG, MEF2C, TNF, IL34, EGR1, THBS4, IL18, S1PR1, RAC2, F2R, PPP1R16B, PIM1, CCL5, CD320, GPR37L1, FABP4, MYC, EPCAM, B4GALT1, LTF                                                                                                                     | 25              |
| biological process | GO:0050673 | epithelial cell proliferation                | 0.001   | CAV2, TEK, PPARG, MEF2C, TNF, THBS4, FAP, PPP1R16B, NFIB, CCL5, MYC, CCL2, B4GALT1                                                                                                                                                                                                          | 13              |
| biological process | GO:0050678 | regulation of epithelial cell proliferation  | 0.004   | CAV2, PPARG, TNF, THBS4, PPP1R16B, NFIB, CCL5, MYC, CCL2, B4GALT1                                                                                                                                                                                                                           | 10              |
| biological process | GO:0043066 | negative regulation of apoptotic process     | < 0.001 | NOS3, MMP9, CORO1A, KITLG, TEK, MEF2C, TNF, MSX2, ANGPTL4, F2R, CAV1, PIM1, MT3, CCL5, TP53, MYC, CLU, ZC3H12A, CITED2, CCL2, FHL2, LTF                                                                                                                                                     | 22              |
| biological process | GO:0060548 | negative regulation of cell death            | < 0.001 | NOS3, MMP9, CORO1A, KITLG, TEK, MEF2C, TNF, MSX2, ANGPTL4, F2R, CAV1, PIM1, MT3, CCL5, TP53, GPR37L1, MYC, CLU, ZC3H12A, CITED2, CCL2, FHL2, LTF                                                                                                                                            | 23              |
| biological process | GO:0043069 | negative regulation of programmed cell death | < 0.001 | NOS3, MMP9, CORO1A, KITLG, TEK, MEF2C, TNF, MSX2, ANGPTL4, F2R, CAV1, PIM1, MT3, CCL5, TP53, MYC, CLU, ZC3H12A, CITED2, CCL2, FHL2, LTF                                                                                                                                                     | 22              |
| biological process | GO:0010942 | positive regulation of cell death            | < 0.001 | PYCARD, MMP9, MAPT, PPARG, MEF2C, TNF, MSX2, FAP, F2R, CAV1, C1QA, MT3, CCL5, SCIN, KCNMA1, ITM2C, TP53, MYC, CLU, ZC3H12A, ADIPOQ, CCL2, S100A9, B4GALT1                                                                                                                                   | 24              |
| biological process | GO:0043065 | positive regulation of apoptotic process     | < 0.001 | PYCARD, MMP9, PPARG, MEF2C, TNF, MSX2, FAP, F2R, CAV1, CCL5, SCIN, KCNMA1, ITM2C, TP53, MYC, CLU, ZC3H12A, ADIPOQ, CCL2, S100A9, B4GALT1                                                                                                                                                    | 21              |
| biological process | GO:0043068 | positive regulation of programmed cell death | < 0.001 | PYCARD, MMP9, PPARG, MEF2C, TNF, MSX2, FAP, F2R, CAV1, CCL5, SCIN, KCNMA1, ITM2C, TP53, MYC, CLU, ZC3H12A, ADIPOQ, CCL2, S100A9, B4GALT1                                                                                                                                                    | 21              |
| biological process | GO:0010941 | regulation of cell death                     | < 0.001 | PYCARD, NOS3, MMP9, MAPT, CORO1A, KITLG, TEK, PPARG, MEF2C, TNF, MSX2, CXCL10, FAP, ANGPTL4, RSL1D1, F2R, CAV1, PIM1, C1QA, MT3, CCL5, SCIN, KCNMA1, ITM2C, TP53, GPR37L1, MYC, CLU, ZC3H12A, ADIPOQ, CITED2, CCL2, FHL2, S100A9, B4GALT1, LTF                                              | 36              |

|                    |            |                                                 |         |                                                                                                                                                                                                                                                                                           |    |
|--------------------|------------|-------------------------------------------------|---------|-------------------------------------------------------------------------------------------------------------------------------------------------------------------------------------------------------------------------------------------------------------------------------------------|----|
| biological process | GO:0042981 | regulation of apoptotic process                 | < 0.001 | PYCARD, NOS3, MMP9, CORO1A, KITLG, TEK, PPARG, MEF2C, TNF, MSX2, CXCL10, FAP, ANGPTL4, RSL1D1, F2R, CAV1, PIM1, MT3, CCL5, SCIN, KCNMA1, ITM2C, TP53, MYC, CLU, ZC3H12A, ADIPOQ, CITED2, CCL2, FHL2, S100A9, B4GALT1, LTF                                                                 | 33 |
| biological process | GO:0043067 | regulation of programmed cell death             | < 0.001 | PYCARD, NOS3, MMP9, CORO1A, KITLG, TEK, PPARG, MEF2C, TNF, MSX2, CXCL10, FAP, ANGPTL4, RSL1D1, F2R, CAV1, PIM1, MT3, CCL5, SCIN, KCNMA1, ITM2C, TP53, MYC, CLU, ZC3H12A, ADIPOQ, CITED2, CCL2, FHL2, S100A9, B4GALT1, LTF                                                                 | 33 |
| biological process | GO:0008219 | cell death                                      | < 0.001 | PYCARD, NOS3, MMP9, MAPT, CORO1A, KITLG, TEK, CDCA7, CHI3L1, PPARG, DIO3, MEF2C, TNF, MSX2, CXCL10, SHISA5, FAP, ANGPTL4, RSL1D1, F2R, CAV1, PIM1, C1QA, MT3, CCL5, SCIN, KCNMA1, PMP22, ITM2C, TP53, GPR37L1, MYC, CLU, ZC3H12A, ADIPOQ, CITED2, CCL2, CIDEA, FHL2, S100A9, B4GALT1, LTF | 42 |
| biological process | GO:0006915 | apoptotic process                               | 0.001   | PYCARD, NOS3, MMP9, CORO1A, KITLG, TEK, CDCA7, CHI3L1, PPARG, DIO3, MEF2C, TNF, MSX2, CXCL10, SHISA5, FAP, ANGPTL4, RSL1D1, F2R, CAV1, PIM1, MT3, CCL5, SCIN, KCNMA1, ITM2C, TP53, MYC, CLU, ZC3H12A, ADIPOQ, CITED2, CCL2, CIDEA, FHL2, S100A9, B4GALT1, LTF                             | 38 |
| biological process | GO:0012501 | programmed cell death                           | 0.002   | PYCARD, NOS3, MMP9, CORO1A, KITLG, TEK, CDCA7, CHI3L1, PPARG, DIO3, MEF2C, TNF, MSX2, CXCL10, SHISA5, FAP, ANGPTL4, RSL1D1, F2R, CAV1, PIM1, MT3, CCL5, SCIN, KCNMA1, ITM2C, TP53, MYC, CLU, ZC3H12A, ADIPOQ, CITED2, CCL2, CIDEA, FHL2, S100A9, B4GALT1, LTF                             | 38 |
| biological process | GO:0008285 | negative regulation of cell proliferation       | 0.002   | CAV2, PPARG, TNF, MSX2, FAP, DDAH1, F2R, NFIB, SCIN, CNN1, TP53, ADIPOQ, CCL2, B4GALT1                                                                                                                                                                                                    | 14 |
| biological process | GO:1904035 | regulation of epithelial cell apoptotic process | 0.005   | TEK, TNF, ANGPTL4, CCL2                                                                                                                                                                                                                                                                   | 4  |
