# Supplementary material for: Short Time-Series Expression Transcriptome Data Reveal the Gene Expression Patterns of Dairy Cow Mammary Gland as Milk Yield Decreased Process
Source: MDPI journal article supplement (doi:10.3390/genes12060942), 2021-06-20
Supplement: s1 [file s1]

**Table S8.** Significantly enriched gene ontology (GO) terms related to protein synthesis in profile 12.

| ID         | Term                                          | FDR   | Gene Name                                                                                                      | Number of Genes |
|------------|-----------------------------------------------|-------|----------------------------------------------------------------------------------------------------------------|-----------------|
| GO:0006396 | RNA processing                                | 0.000 | <i>C1QBP, MAGOH, MAK16, NOP56, POP5, RPF2, RRS1, SNRPA, SNRPB, SNRPC, SNRPD2, SNRPG, SRSF3, TBL3, TRMT61A</i>  | 15              |
| GO:0016071 | mRNA metabolic process                        | 0.001 | <i>C1QBP, MAGOH, SNRPA, SNRPB, SNRPC, SNRPD2, SNRPG, SRSF3, TRMT61A, ZC3H12A</i>                               | 10              |
| GO:0008380 | RNA splicing                                  | 0.002 | <i>C1QBP, MAGOH, SNRPA, SNRPB, SNRPC, SNRPD2, SNRPG, SRSF3</i>                                                 | 8               |
| GO:0006397 | mRNA processing                               | 0.004 | <i>C1QBP, MAGOH, SNRPA, SNRPB, SNRPC, SNRPD2, SNRPG, SRSF3</i>                                                 | 8               |
| GO:0000398 | mRNA splicing                                 | 0.013 | <i>SNRPA, SNRPB, SNRPC, SNRPD2, SNRPG</i>                                                                      | 5               |
| GO:0048024 | regulation of mRNA splicing                   | 0.040 | <i>C1QBP, MAGOH, SRSF3</i>                                                                                     | 3               |
| GO:0022613 | ribonucleoprotein complex biogenesis          | 0.000 | <i>C1QBP, HSP90AA1, MAK16, NOC2L, NOP16, NOP56, RPF2, RRS1, SDAD1, SHQ1, SNRPB, SNRPC, SNRPD2, SNRPG, TBL3</i> | 15              |
| GO:0022618 | ribonucleoprotein complex assembly            | 0.000 | <i>C1QBP, HSP90AA1, RPF2, RRS1, SHQ1, SNRPB, SNRPC, SNRPD2, SNRPG</i>                                          | 9               |
| GO:0042254 | ribosome biogenesis                           | 0.000 | <i>C1QBP, MAK16, NOC2L, NOP16, NOP56, RPF2, RRS1, SDAD1, TBL3</i>                                              | 9               |
| GO:0042273 | ribosomal large subunit biogenesis            | 0.000 | <i>MAK16, NOC2L, NOP16, RPF2, RRS1, SDAD1</i>                                                                  | 6               |
| GO:0000387 | spliceosomal snRNP assembly                   | 0.003 | <i>SNRPB, SNRPC, SNRPD2, SNRPG</i>                                                                             | 4               |
| GO:0006364 | rRNA processing                               | 0.017 | <i>MAK16, NOP56, RPF2, RRS1, TBL3</i>                                                                          | 5               |
| GO:0071426 | ribonucleoprotein complex export from nucleus | 0.006 | <i>RRS1, SDAD1, SHFM1, SRSF3</i>                                                                               | 4               |
| GO:0000055 | ribosomal large subunit export from nucleus   | 0.015 | <i>RRS1, SDAD1</i>                                                                                             | 2               |
| GO:0006457 | protein folding                               | 0.002 | <i>CCT3, CCT4, CCT6A, HSP90AA1, HSP90AB1, HSP90B1, HSPE1</i>                                                   | 7               |
| GO:0006458 | “de novo” protein folding                     | 0.002 | <i>CCT3, CCT4, CCT6A, HSPE1</i>                                                                                | 4               |
| GO:0061077 | chaperone-mediated protein folding            | 0.008 | <i>CCT3, CCT4, CCT6A, HSPE1</i>                                                                                | 4               |
