# Supplementary material for: Short Time-Series Expression Transcriptome Data Reveal the Gene Expression Patterns of Dairy Cow Mammary Gland as Milk Yield Decreased Process
Source: MDPI journal article supplement (doi:10.3390/genes12060942), 2021-06-20
Supplement: s1 [file s1]

Table S5. Top 20 significantly enriched gene ontology (GO) terms in each category during peak and late lactation.

| Category           | ID         | Term                                    | P-value | Gene Name                                                                                                                                                                                                                                                                                                                                              | Number of Genes |
|--------------------|------------|-----------------------------------------|---------|--------------------------------------------------------------------------------------------------------------------------------------------------------------------------------------------------------------------------------------------------------------------------------------------------------------------------------------------------------|-----------------|
| cellular component | GO:0034719 | SMN-Sm protein complex                  | < 0.001 | <i>SNRPE, SNRPB, SNRPF, SNRPD2, SMN2, SNRPG, SNRPD1</i>                                                                                                                                                                                                                                                                                                | 7               |
| cellular component | GO:0097525 | spliceosomal snRNP complex              | < 0.001 | <i>SNRPE, SNRPB, SNRPF, SNRPA, SNRPD2, SNRPG, SNRPC, SNRPD1</i>                                                                                                                                                                                                                                                                                        | 8               |
| cellular component | GO:0034708 | methyltransferase complex               | < 0.001 | <i>SNRPE, RUVBL2, SNRPB, SNRPF, SNRPD2, WDR77, PRMT5, SNRPG, SNRPD1</i>                                                                                                                                                                                                                                                                                | 9               |
| cellular component | GO:0030532 | small nuclear ribonucleoprotein complex | < 0.001 | <i>SNRPE, SNRPB, SNRPF, SNRPA, SNRPD2, SNRPG, SNRPC, SNRPD1</i>                                                                                                                                                                                                                                                                                        | 8               |
| cellular component | GO:0120114 | Sm-like protein family complex          | < 0.001 | <i>SNRPE, SNRPB, SNRPF, SNRPA, SNRPD2, SMN2, SNRPG, SNRPC, SNRPD1</i>                                                                                                                                                                                                                                                                                  | 9               |
| cellular component | GO:0046540 | U4/U6 x U5 tri-snRNP complex            | < 0.001 | <i>SNRPE, SNRPB, SNRPF, SNRPD2, SNRPG, SNRPD1</i>                                                                                                                                                                                                                                                                                                      | 6               |
| cellular component | GO:0097526 | spliceosomal tri-snRNP complex          | < 0.001 | <i>SNRPE, SNRPB, SNRPF, SNRPD2, SNRPG, SNRPD1</i>                                                                                                                                                                                                                                                                                                      | 6               |
| cellular component | GO:0005839 | proteasome core complex                 | 0.001   | <i>PSMB9, PSMA4, PSMA5, PSMA3, PSMA1, PSMB10, PSMB8</i>                                                                                                                                                                                                                                                                                                | 7               |
| cellular component | GO:0044421 | extracellular region part               | 0.001   | <i>BPIFA1, BPIFB1, PRSS2, IL6, MMP9, SERPINF2, TGFB2, SERPINA3-1, DEFB1, ANGPTL4, CHI3L1, IL18, THBS4, PGK1, LBP, CXCL17, TNF, SCNN1A, IL1B, IL34, BSP5, ANGPT1, CCL3, CD9, MFAP2, PTGDS, CMTM8, ANXA2, FBLN5, MMP2, IGFBP2, RETN, LY96, FAP, DCN, ANGPTL1, CNP, TCN2, CRELD2, FGG, CLIC1, MFAP5, LUM, LTF, MYOC, CRISPLD2, CLU, PTN, APOD, CSN1S2</i> | 50              |
| cellular component | GO:0005615 | extracellular space                     | 0.001   | <i>BPIFA1, BPIFB1, PRSS2, IL6, MMP9, SERPINF2, TGFB2, SERPINA3-1, ANGPTL4, CHI3L1, IL18, THBS4, PGK1, LBP, CXCL17, TNF, SCNN1A, IL1B, IL34, BSP5, ANGPT1, CCL3, CD9, PTGDS, CMTM8, FBLN5, IGFBP2, RETN, LY96, FAP, ANGPTL1, CNP, TCN2, CRELD2, FGG, CLIC1, LTF, MYOC, CLU, PTN, APOD, CSN1S2</i>                                                       | 42              |
| cellular component | GO:0071007 | U2-type catalytic step 2 spliceosome    | 0.002   | <i>SNRPE, SNRPB, SNRPF, SNRPD2, SNRPG, SNRPD1</i>                                                                                                                                                                                                                                                                                                      | 6               |
| cellular component | GO:0031226 | intrinsic component of plasma membrane  | 0.006   | <i>IL6, SLC1A1, RHBG, CD40, SLC1A3, SLC6A6, TNF, SCNN1A, SLC16A1, SLC26A2, HCRTR1, NCF1, FCER1G, SLC8A1, LY96, SLC2A5, C7, SCARA5, RAB26, PLAUR, STRA6, SELL, FOLR3, SLC6A4, S1PR1, CLSTN3, NPR2</i>                                                                                                                                                   | 27              |
| cellular component | GO:0034399 | nuclear periphery                       | 0.006   | <i>PHB2, NUP93, EIF6, UHRF1, TP53, PCNA, MAPT, KRT8</i>                                                                                                                                                                                                                                                                                                | 8               |
| cellular component | GO:0071005 | U2-type precatalytic spliceosome        | 0.007   | <i>SNRPE, SNRPB, SNRPF, SF3B5, SNRPD2, SNRPG, SNRPD1</i>                                                                                                                                                                                                                                                                                               | 7               |
| cellular component | GO:0071011 | precatalytic spliceosome                | 0.007   | <i>SNRPE, SNRPB, SNRPF, SF3B5, SNRPD2, SNRPG, SNRPD1</i>                                                                                                                                                                                                                                                                                               | 7               |
| cellular component | GO:0042470 | melanosome                              | 0.007   | <i>HSP90AB1, HSP90AA1, CCT4, PDIA3, HSP90B1, ANXA2, SERPINF1, AHCY, PDIA4, CTNS, CNP, FASN</i>                                                                                                                                                                                                                                                         | 12              |
| cellular component | GO:0048770 | pigment granule                         | 0.007   | <i>HSP90AB1, HSP90AA1, CCT4, PDIA3, HSP90B1, ANXA2, SERPINF1, AHCY, PDIA4, CTNS, CNP, FASN</i>                                                                                                                                                                                                                                                         | 12              |
| cellular component | GO:0031012 | extracellular matrix                    | 0.011   | <i>MMP9, TGFB2, THBS4, MFAP2, ANXA2, FBLN5, MMP2, DCN, MFAP5, LUM, MYOC, CRISPLD2, CLU</i>                                                                                                                                                                                                                                                             | 13              |
| cellular component | GO:0009986 | cell surface                            | 0.012   | <i>SERPINF2, TYROBP, CD40, SLC1A3, TNF, CD9, CD99L2, GOT2, FAP, SCARA5, NRR0S, PLAUR, MXRA8, ENPP3, FOLR3, LTF, S1PR1, ADRA2B</i>                                                                                                                                                                                                                      | 18              |
| cellular component | GO:0043230 | extracellular organelle                 | 0.018   | <i>DEFB1, SCNN1A, IL1B, CD9, ANXA2, CLIC1, MYOC</i>                                                                                                                                                                                                                                                                                                    | 7               |

|                    |            |                                       |         |                                                                                                                                                                                                                                                                                                                                                                                 |    |
|--------------------|------------|---------------------------------------|---------|---------------------------------------------------------------------------------------------------------------------------------------------------------------------------------------------------------------------------------------------------------------------------------------------------------------------------------------------------------------------------------|----|
| molecular function | GO:0005102 | signaling receptor binding            | < 0.001 | CCL20, S100A9, IL6, IL1RN, DOK2, TGFB2, DEFB1, C1QBP, S100A12, PPID, CXCL5, RND1, IL18, THBS4, CXCL2, TNF, S100A8, IL1B, SYT1, TUBB, IL34, FAM49B, ANGPT1, ANGPT4, SPG21, RASL11B, CCL3, RAPGEF2, HSP90B1, CD9, CMTM8, SPADH1, MIA, TP53, CCL5, S100A14, SPP1, PCNA, FBLN5, CXCL8, TGFBI, RETN, LY96, MAPT, FAP, PLAUR, ANGPTL1, FGG, MANF, FERMT3, OGN, LTF, S1PR1, PTN, PPARG | 55 |
| molecular function | GO:0042379 | chemokine receptor binding            | < 0.001 | CCL20, DEFB1, CXCL5, CCL3, CCL5, S100A14, CXCL8                                                                                                                                                                                                                                                                                                                                 | 7  |
| molecular function | GO:0005126 | cytokine receptor binding             | 0.001   | CCL20, IL6, IL1RN, TGFB2, DEFB1, CXCL5, IL18, TNF, IL34, RASL11B, CCL3, CCL5, S100A14, CXCL8                                                                                                                                                                                                                                                                                    | 14 |
| molecular function | GO:0004298 | threonine-type endopeptidase activity | 0.001   | PSMB9, PSMA4, PSMA5, PSMA3, PSMA1, PSMB10, PSMB8                                                                                                                                                                                                                                                                                                                                | 7  |
| molecular function | GO:0070003 | threonine-type peptidase activity     | 0.001   | PSMB9, PSMA4, PSMA5, PSMA3, PSMA1, PSMB10, PSMB8                                                                                                                                                                                                                                                                                                                                | 7  |
| molecular function | GO:0005178 | integrin binding                      | 0.002   | THBS4, IL1B, CD9, FBLN5, TGFBI, FAP, FERMT3                                                                                                                                                                                                                                                                                                                                     | 7  |
| molecular function | GO:0005125 | cytokine activity                     | 0.009   | IL6, IL1RN, CXCL5, IL18, TNF, IL1B, IL34, CCL3, CMTM8, SPP1                                                                                                                                                                                                                                                                                                                     | 10 |
| molecular function | GO:0030971 | receptor tyrosine kinase binding      | 0.009   | DOK2, ANGPT1, ANGPT4, TP53, PCNA                                                                                                                                                                                                                                                                                                                                                | 5  |
| molecular function | GO:0030246 | carbohydrate binding                  | 0.010   | LGALS4, CLEC6A, FBXO2, OLR1, CHI3L1, CALR, FCN1, GALM, SLC2A5, COLEC12, ENPP3, SBSPON, SELL, FBP1                                                                                                                                                                                                                                                                               | 14 |
| molecular function | GO:0050839 | cell adhesion molecule binding        | 0.010   | THBS4, IL1B, CD9, CXADR, FBLN5, TGFBI, FAP, FERMT3                                                                                                                                                                                                                                                                                                                              | 8  |
| molecular function | GO:0051287 | NAD binding                           | 0.015   | UGDH, ALDH2, IDH3A, AHCY, ALDH1A1, GPD1                                                                                                                                                                                                                                                                                                                                         | 6  |
| molecular function | GO:0016835 | carbon-oxygen lyase activity          | 0.015   | ENOSF1, TPI1, ENO1, APEX1, CA6, PCBD1, FASN, CA4                                                                                                                                                                                                                                                                                                                                | 8  |
| molecular function | GO:1990782 | protein tyrosine kinase binding       | 0.018   | DOK2, ANGPT1, ANGPT4, TP53, PCNA                                                                                                                                                                                                                                                                                                                                                | 5  |
| molecular function | GO:0003714 | transcription corepressor activity    | 0.018   | C1QBP, CRYM, BASP1, PBXIP1, PRMT5, CITED2, BHLHE40                                                                                                                                                                                                                                                                                                                              | 7  |
| molecular function | GO:0019904 | protein domain specific binding       | 0.020   | HSP90AB1, HSP90AA1, FOXA3, CHAF1A, ETV6, PYCARD, BASP1, SCNN1A, RAPGEF2, GNG5, NCF1, TP53, CXADR, HEYL, CCT6A, SH3BGRL2, MAPT, PLAUR, PPARG, BHLHE40                                                                                                                                                                                                                            | 20 |
| molecular function | GO:0004930 | G protein-coupled receptor activity   | 0.021   | PROKR2, CXCR1, GPR37L1, HCRTR1, TBXA2R, F2R, GPR68, ADCYAP1R1, ACKR1, AGTR1, PTGDR, F2RL1, S1PR1, ADRA2B                                                                                                                                                                                                                                                                        | 14 |
| molecular function | GO:0001653 | peptide receptor activity             | 0.022   | PROKR2, CXCR1, GPR37L1, HCRTR1, F2R, AGTR1, F2RL1, NPR2                                                                                                                                                                                                                                                                                                                         | 8  |
| molecular function | GO:0016836 | hydro-lyase activity                  | 0.026   | ENOSF1, ENO1, CA6, PCBD1, FASN, CA4                                                                                                                                                                                                                                                                                                                                             | 6  |
| molecular function | GO:0016829 | lyase activity                        | 0.029   | DDC, SDS, MOCOS, ENOSF1, TPI1, ENO1, APEX1, MOCS1, CA6, PCBD1, ECHDC1, FASN, CA4, NPR2                                                                                                                                                                                                                                                                                          | 14 |
| molecular function | GO:0001664 | G protein-coupled receptor binding    | 0.031   | CCL20, DEFB1, C1QBP, CXCL5, CCL3, RAPGEF2, CCL5, S100A14, CXCL8, S1PR1                                                                                                                                                                                                                                                                                                          | 10 |
