# Supplementary material for: Short Time-Series Expression Transcriptome Data Reveal the Gene Expression Patterns of Dairy Cow Mammary Gland as Milk Yield Decreased Process
Source: MDPI journal article supplement (doi:10.3390/genes12060942), 2021-06-20
Supplement: s1 [file s1]

Table S3. Basic information of sequencing reads and bases.

| Sample | Raw reads | Raw bases | Clean reads | Clean bases | Valid bases | Q30    | GC     |
|--------|-----------|-----------|-------------|-------------|-------------|--------|--------|
| A-90   | 61255240  | 7.66G     | 60490684    | 7.56G       | 98.72%      | 97.14% | 48.50% |
| B-90   | 61664866  | 7.71G     | 60994408    | 7.62G       | 98.89%      | 97.33% | 47.50% |
| C-90   | 59050772  | 7.38G     | 58314034    | 7.29G       | 98.72%      | 97.11% | 49.00% |
| A-180  | 73996266  | 9.25G     | 72947722    | 9.12G       | 98.56%      | 96.54% | 48.00% |
| B-180  | 67909316  | 8.49G     | 66910040    | 8.36G       | 98.51%      | 96.33% | 49.00% |
| C-180  | 75935580  | 9.49G     | 74705698    | 9.34G       | 98.36%      | 96.19% | 50.00% |
| A-270  | 71589742  | 8.95G     | 70550840    | 8.82G       | 98.53%      | 96.48% | 48.50% |
| B-270  | 77932606  | 9.74G     | 76857188    | 9.61G       | 98.60%      | 96.44% | 49.00% |
| C-270  | 64104356  | 8.01G     | 62867970    | 7.86G       | 98.05%      | 95.92% | 49.00% |
