# Supplementary material for: Short Time-Series Expression Transcriptome Data Reveal the Gene Expression Patterns of Dairy Cow Mammary Gland as Milk Yield Decreased Process
Source: MDPI journal article supplement (doi:10.3390/genes12060942), 2021-06-20
Supplement: s1 [file s1]

Table S12. Significantly enriched gene ontology (GO) terms related to energy metabolism during peak and late lactation.

| Category           | ID         | Term                                                     | P-value | Gene Name                                                                                                                                                                                                                                                                                                           | Number of Genes |
|--------------------|------------|----------------------------------------------------------|---------|---------------------------------------------------------------------------------------------------------------------------------------------------------------------------------------------------------------------------------------------------------------------------------------------------------------------|-----------------|
| biological process | GO:0019363 | pyridine nucleotide biosynthetic process                 | < 0.001 | <i>ACTN3, PGAM1, EIF6, PGK1, TPI1, ENO1, QPRT, TP53, NAPRT, FBP1, GPD1</i>                                                                                                                                                                                                                                          | 11              |
| biological process | GO:0019362 | pyridine nucleotide metabolic process                    | < 0.001 | <i>ACTN3, PGAM1, EIF6, PGK1, TPI1, ENO1, QPRT, TP53, NAPRT, FBP1, GPD1, MPC1</i>                                                                                                                                                                                                                                    | 12              |
| biological process | GO:0006090 | pyruvate metabolic process                               | < 0.001 | <i>ACTN3, SDS, PGAM1, EIF6, PGK1, TPI1, ENO1, TP53, FBP1, GPD1, MPC1</i>                                                                                                                                                                                                                                            | 11              |
| biological process | GO:0042866 | pyruvate biosynthetic process                            | < 0.001 | <i>ACTN3, SDS, PGAM1, EIF6, PGK1, TPI1, ENO1, TP53, FBP1, GPD1</i>                                                                                                                                                                                                                                                  | 10              |
| biological process | GO:0072524 | pyridine-containing compound metabolic process           | < 0.001 | <i>ACTN3, PGAM1, EIF6, PGK1, TPI1, ENO1, QPRT, TP53, NAPRT, FBP1, GPD1, MPC1</i>                                                                                                                                                                                                                                    | 12              |
| biological process | GO:0019359 | nicotinamide nucleotide biosynthetic process             | < 0.001 | <i>ACTN3, PGAM1, EIF6, PGK1, TPI1, ENO1, QPRT, TP53, FBP1, GPD1</i>                                                                                                                                                                                                                                                 | 10              |
| biological process | GO:0046496 | nicotinamide nucleotide metabolic process                | < 0.001 | <i>ACTN3, PGAM1, EIF6, PGK1, TPI1, ENO1, QPRT, TP53, FBP1, GPD1, MPC1</i>                                                                                                                                                                                                                                           | 11              |
| biological process | GO:0046031 | ADP metabolic process                                    | < 0.001 | <i>ACTN3, PGAM1, EIF6, PGK1, TPI1, ENO1, TP53, AK2, FBP1, GPD1</i>                                                                                                                                                                                                                                                  | 10              |
| biological process | GO:0006096 | glycolytic process                                       | < 0.001 | <i>ACTN3, PGAM1, EIF6, PGK1, TPI1, ENO1, TP53, FBP1, GPD1</i>                                                                                                                                                                                                                                                       | 9               |
| biological process | GO:0006757 | ATP generation from ADP                                  | < 0.001 | <i>ACTN3, PGAM1, EIF6, PGK1, TPI1, ENO1, TP53, FBP1, GPD1</i>                                                                                                                                                                                                                                                       | 9               |
| biological process | GO:0006732 | coenzyme metabolic process                               | < 0.001 | <i>VNN1, ACTN3, MTHFD1L, PGAM1, EIF6, PGK1, SHMT2, MOCOS, TPI1, ENO1, QPRT, MOCS1, TP53, NAPRT, PCBD1, MTHFR, ACACA, FBP1, GPD1, MPC1</i>                                                                                                                                                                           | 20              |
| biological process | GO:0006110 | regulation of glycolytic process                         | < 0.001 | <i>ACTN3, PGAM1, EIF6, TP53, FBP1, GPD1</i>                                                                                                                                                                                                                                                                         | 6               |
| biological process | GO:0009135 | purine nucleoside diphosphate metabolic process          | < 0.001 | <i>ACTN3, PGAM1, EIF6, PGK1, TPI1, ENO1, TP53, AK2, FBP1, GPD1</i>                                                                                                                                                                                                                                                  | 10              |
| biological process | GO:0009179 | purine ribonucleoside diphosphate metabolic process      | < 0.001 | <i>ACTN3, PGAM1, EIF6, PGK1, TPI1, ENO1, TP53, AK2, FBP1, GPD1</i>                                                                                                                                                                                                                                                  | 10              |
| biological process | GO:0009185 | ribonucleoside diphosphate metabolic process             | < 0.001 | <i>ACTN3, PGAM1, EIF6, PGK1, TPI1, ENO1, TP53, AK2, FBP1, GPD1</i>                                                                                                                                                                                                                                                  | 10              |
| biological process | GO:0006733 | oxidoreduction coenzyme metabolic process                | 0.001   | <i>ACTN3, PGAM1, EIF6, PGK1, TPI1, ENO1, QPRT, TP53, NAPRT, FBP1, GPD1, MPC1</i>                                                                                                                                                                                                                                    | 12              |
| biological process | GO:0051196 | regulation of coenzyme metabolic process                 | 0.001   | <i>ACTN3, PGAM1, EIF6, TP53, FBP1, GPD1</i>                                                                                                                                                                                                                                                                         | 6               |
| biological process | GO:0043436 | oxoacid metabolic process                                | 0.001   | <i>UGDH, DDC, VNN1, ACTN3, ACSBG1, SDS, MTHFD1L, PGAM1, THEM4, EIF6, PGK1, SLC1A3, IVD, SHMT2, ENOSF1, LTA4H, ANGPT1, TPI1, IDH3A, ENO1, PTGDS, GAMT, TP53, HAGH, DPYD, HADHB, DDAH1, AHCY, GOT2, ASRGL1, GLUL, DCN, MDH2, ITIH5, LDHA, FAH, MTHFR, ACACA, FADS2, FBP1, ASS1, GCAT, FASN, SCD5, GPD1, PAH, MPC1</i> | 47              |
| biological process | GO:0006801 | superoxide metabolic process                             | 0.001   | <i>SOD2, TNF, NCF1, MAPT, NRROS, F2RL1</i>                                                                                                                                                                                                                                                                          | 6               |
| biological process | GO:2001169 | regulation of ATP biosynthetic process                   | 0.001   | <i>ACTN3, PGAM1, EIF6, TP53, FBP1, GPD1</i>                                                                                                                                                                                                                                                                         | 6               |
| biological process | GO:0009127 | purine nucleoside monophosphate biosynthetic process     | 0.001   | <i>HPRT1, IMPDH2, ACTN3, PGAM1, EIF6, PGK1, APRT, TPI1, ENO1, TP53, AK2, FBP1, GPD1</i>                                                                                                                                                                                                                             | 13              |
| biological process | GO:0009168 | purine ribonucleoside monophosphate biosynthetic process | 0.001   | <i>HPRT1, IMPDH2, ACTN3, PGAM1, EIF6, PGK1, APRT, TPI1, ENO1, TP53, AK2, FBP1, GPD1</i>                                                                                                                                                                                                                             | 13              |
| biological process | GO:1903578 | regulation of ATP metabolic process                      | 0.002   | <i>ACTN3, PGAM1, EIF6, SHMT2, TP53, PPIF, FBP1, GPD1</i>                                                                                                                                                                                                                                                            | 8               |

|                    |            |                                                  |       |                                                                                                                     |    |
|--------------------|------------|--------------------------------------------------|-------|---------------------------------------------------------------------------------------------------------------------|----|
| biological process | GO:0009144 | purine nucleoside triphosphate metabolic process | 0.041 | <i>ACTN3, PGAM1, EIF6, PGK1, SHMT2, TPI1, ENO1, MOCS1, TP53, AK2, PPIF, SAMHD1, ENPP3, FBP1, GPD1</i>               | 15 |
| biological process | GO:0009141 | nucleoside triphosphate metabolic process        | 0.043 | <i>ACTN3, PGAM1, EIF6, DCTPP1, PGK1, SHMT2, TPI1, ENO1, MOCS1, TP53, AK2, PPIF, SAMHD1, ENPP3, FBP1, GPD1</i>       | 16 |
| biological process | GO:0009142 | nucleoside triphosphate biosynthetic process     | 0.044 | <i>ACTN3, PGAM1, EIF6, PGK1, TPI1, ENO1, TP53, FBP1, GPD1</i>                                                       | 9  |
| biological process | GO:0009161 | ribonucleoside monophosphate metabolic process   | 0.046 | <i>HPRT1, IMPDH2, ACTN3, PGAM1, EIF6, PGK1, SHMT2, APRT, TPI1, ENO1, TP53, AK2, PPIF, ENPP3, FBP1, GPD1</i>         | 16 |
| biological process | GO:0009116 | nucleoside metabolic process                     | 0.048 | <i>HPRT1, IMPDH2, APRT, MOCS1, DPYD, AHCY, PNP, PTGDR</i>                                                           | 8  |
| molecular function | GO:0051287 | NAD binding                                      | 0.015 | <i>UGDH, ALDH2, IDH3A, AHCY, ALDH1A1, GPD1</i>                                                                      | 6  |
| molecular function | GO:0016835 | carbon-oxygen lyase activity                     | 0.015 | <i>ENOSF1, TPI1, ENO1, APEX1, CA6, PCBD1, FASN, CA4</i>                                                             | 8  |
| molecular function | GO:0016836 | hydro-lyase activity                             | 0.026 | <i>ENOSF1, ENO1, CA6, PCBD1, FASN, CA4</i>                                                                          | 6  |
| molecular function | GO:0016829 | lyase activity                                   | 0.029 | <i>DDC, SDS, MOCOS, ENOSF1, TPI1, ENO1, APEX1, MOCS1, CA6, PCBD1, ECHDC1, FASN, CA4, NPR2</i>                       | 14 |
| molecular function | GO:0050662 | coenzyme binding                                 | 0.032 | <i>UGDH, DDC, SDS, CRYM, DDO, IVD, SHMT2, MOCOS, ALDH2, IDH3A, POR, DPYD, AHCY, GOT2, FMO3, ALDH1A1, GCAT, GPD1</i> | 18 |
| molecular function | GO:0050661 | NADP binding                                     | 0.039 | <i>CRYM, POR, DPYD, FMO3</i>                                                                                        | 4  |
