# Supplementary material for: Short Time-Series Expression Transcriptome Data Reveal the Gene Expression Patterns of Dairy Cow Mammary Gland as Milk Yield Decreased Process
Source: MDPI journal article supplement (doi:10.3390/genes12060942), 2021-06-20
Supplement: s1 [file s1]

**Table S7.** Significantly enriched gene ontology (GO) terms and KEGG pathway related to milk fat synthesis in profile 0.

| ID         | Term / Pathway                                                    | FDR   | Gene Name                                                  | Number of Genes |
|------------|-------------------------------------------------------------------|-------|------------------------------------------------------------|-----------------|
| GO:0008374 | O-acyltransferase activity                                        | 0.000 | <i>AGPAT1, AGPAT6, GPAM, LRAT</i>                          | 4               |
| GO:0016747 | transferase activity                                              | 0.000 | <i>AGPAT1, AGPAT6, FASN, GCAT, GPAM, LRAT</i>              | 6               |
| GO:0016024 | CDP-diacylglycerol biosynthetic process                           | 0.006 | <i>AGPAT1, AGPAT6, GPAM</i>                                | 3               |
| GO:0046341 | CDP-diacylglycerol metabolic process                              | 0.006 | <i>AGPAT1, AGPAT6, GPAM</i>                                | 3               |
| GO:0004366 | glycerol-3-phosphate O-acyltransferase activity                   | 0.007 | <i>AGPAT6, GPAM</i>                                        | 2               |
| GO:0102420 | sn-1-glycerol-3-phosphate C16:0-DCA-CoA acyl transferase activity | 0.007 | <i>AGPAT6, GPAM</i>                                        | 2               |
| GO:0019752 | carboxylic acid metabolic process                                 | 0.024 | <i>ACACA, ASS1, C1QTNF9, FAH, FASN, GCAT, IVD, PAH</i>     | 8               |
| GO:0044255 | cellular lipid metabolic process                                  | 0.027 | <i>ACACA, AGPAT1, AGPAT6, C1QTNF9, FASN, GPAM, LRAT</i>    | 7               |
| GO:0008610 | lipid biosynthetic process                                        | 0.038 | <i>ACACA, AGPAT1, AGPAT6, FASN, GPAM</i>                   | 5               |
| bta00561   | Glycerolipid metabolism                                           | 0.003 | <i>AGPAT1, AGPAT6, GPAM</i>                                | 3               |
| bta00061   | Fatty acid biosynthesis                                           | 0.004 | <i>ACACA, FASN</i>                                         | 2               |
| bta00564   | Glycerophospholipid metabolism                                    | 0.007 | <i>AGPAT1, AGPAT6, GPAM</i>                                | 3               |
| bta01100   | Metabolic pathways                                                | 0.007 | <i>ACACA, AGPAT1, AGPAT6, ASS1, FASN, GPAM, NT5E, UGP2</i> | 7               |
| bta04975   | Fat digestion and absorption                                      | 0.017 | <i>AGPAT1, CD36</i>                                        | 2               |
| bta01212   | Fatty acid metabolism                                             | 0.018 | <i>ACACA, FASN</i>                                         | 2               |
