# Supplementary material for: Short Time-Series Expression Transcriptome Data Reveal the Gene Expression Patterns of Dairy Cow Mammary Gland as Milk Yield Decreased Process
Source: MDPI journal article supplement (doi:10.3390/genes12060942), 2021-06-20
Supplement: s1 [file s1]

Table S1. The primers used to qRT-PCR.

| Gene                            | Forward Primers (5'-3') | Reverse Primers (5'-3') | Length (bp) | GenBank ID     |
|---------------------------------|-------------------------|-------------------------|-------------|----------------|
| <i>ACACA</i>                    | CTCCAACCTCAACCACTACGG   | GGGGAATCACAGAAGCAGCC    | 171         | XM_005693156.1 |
| <i>AGPAT6</i>                   | AAGCAAGTTGCCCATCCTCA    | AAACTGTGGCTCCAATTTCGA   | 101         | NM_001083669.1 |
| <i>FASN</i>                     | GGGCTCCACCACCGTGTCCA    | GCTCTGCTGGGCCTGCAGCTG   | 226         | DQ915966.3     |
| <i>GPAM</i>                     | ATTGACCCCTGGCACGATAG    | AACAGCACCTTCCCACAAAG    | 188         | AY515690       |
| <i>LTF</i>                      | CGTGAGGACTTCAGGTTGCT    | CTATCGCTCCGAGACACCAC    | 113         | NM_180998.2    |
| <i>MCM5</i>                     | TCATCCAGGACTTCACCAAGC   | TGCATGCGGTGTTGGATCTC    | 97          | NM_001075290.2 |
| <i>PFAS</i>                     | CCTACAGGAGTAGCCCCCTT    | TTGGATCCTCCCAGGGCATA    | 163         | NM_001256564.1 |
| <i>RBMS1</i>                    | GGAGAGGCTGGAATGACACT    | CTTTGCACCTGGTAGGCAGA    | 158         | NM_001035361.1 |
| <i>RPS9</i>                     | CCTCGACCAAGAGCTGAAG     | CCTCCAGACCTCACGTTTGTC   | 62          | NM_001034034.2 |
| <i><math>\beta</math>-actin</i> | CATCCTGACCCTCAAGTA      | CTCGTTGTAGAAGGTGTG      | 91          | NM_173979.3    |
