# Supplementary material for: Short Time-Series Expression Transcriptome Data Reveal the Gene Expression Patterns of Dairy Cow Mammary Gland as Milk Yield Decreased Process
Source: MDPI journal article supplement (doi:10.3390/genes12060942), 2021-06-20
Supplement: s1 [file s1]

Table S10. Significantly enriched gene ontology (GO) terms related to material binding during peak and mid lactation.

| Category           | ID         | Term                               | P-value | Gene Name                                                                                                                                 | Number of Genes |
|--------------------|------------|------------------------------------|---------|-------------------------------------------------------------------------------------------------------------------------------------------|-----------------|
| molecular function | GO:0033293 | monocarboxylic acid binding        | < 0.001 | <i>ALOX5AP, PAEP, SERPINA5, CRABP1, FABP4, FABP5, S100A9</i>                                                                              | 7               |
| molecular function | GO:0005501 | retinoid binding                   | 0.001   | <i>PAEP, SERPINA5, CRABP1, PTGDS, FABP5</i>                                                                                               | 5               |
| molecular function | GO:0005504 | fatty acid binding                 | 0.002   | <i>ALOX5AP, PAEP, FABP4, FABP5, S100A9</i>                                                                                                | 5               |
| molecular function | GO:0031406 | carboxylic acid binding            | 0.002   | <i>ALOX5AP, PAEP, SERPINA5, CRABP1, FABP4, FABP5, ADIPOQ, TAT, S100A9</i>                                                                 | 9               |
| molecular function | GO:0043177 | organic acid binding               | 0.002   | <i>ALOX5AP, PAEP, SERPINA5, CRABP1, FABP4, FABP5, ADIPOQ, TAT, S100A9</i>                                                                 | 9               |
| molecular function | GO:0050661 | NADP binding                       | 0.003   | <i>NOS3, DPYD, CRYM, POR, FMO3</i>                                                                                                        | 5               |
| molecular function | GO:0005539 | glycosaminoglycan binding          | 0.013   | <i>PGLYRP1, THBS4, CXCL10, SERPINA5, APOE, CLEC3B, LTF, LTBP2</i>                                                                         | 8               |
| molecular function | GO:0030246 | carbohydrate binding               | 0.014   | <i>GALNT6, CHI3L1, CLEC1A, SLC2A5, COLEC12, SBSPON, CLEC3B, GALM, FBP1</i>                                                                | 9               |
| molecular function | GO:0044877 | protein-containing complex binding | 0.015   | <i>ADRB2, FCGR2B, MAPT, SLC6A4, CORO1A, CFL2, THBS4, TGFBI, USH1C, CTSK, FAP, CORO2A, PIM1, SCIN, COLEC12, FERMT3, TP53, MYC, ZC3H12A</i> | 19              |
| molecular function | GO:0017016 | Ras GTPase binding                 | 0.045   | <i>SLC6A4, SGSM3, VAV1, ARHGEF39, CAV1, RASGEF1B</i>                                                                                      | 6               |
| molecular function | GO:0031267 | small GTPase binding               | 0.045   | <i>SLC6A4, SGSM3, VAV1, ARHGEF39, CAV1, RASGEF1B</i>                                                                                      | 6               |
