# Supplementary material for: Short Time-Series Expression Transcriptome Data Reveal the Gene Expression Patterns of Dairy Cow Mammary Gland as Milk Yield Decreased Process
Source: MDPI journal article supplement (doi:10.3390/genes12060942), 2021-06-20
Supplement: s1 [file s1]

**Table S2.** Milk yield, milk composition and somatic cell count of the 33 cows in the 90th, 180th and 270th day after lactation (Mean  $\pm$  SD).

| Lactation days                                 | 90 d                          | 180 d                         | 270 d                         | <i>p-value</i> |
|------------------------------------------------|-------------------------------|-------------------------------|-------------------------------|----------------|
| Milk yield (kg)                                | 34.40 $\pm$ 1.61 <sup>a</sup> | 31.12 $\pm$ 1.49 <sup>b</sup> | 26.46 $\pm$ 1.15 <sup>c</sup> | <0.05          |
| Milk protein (g/100g)                          | 3.03 $\pm$ 0.09 <sup>c</sup>  | 3.26 $\pm$ 0.08 <sup>b</sup>  | 3.56 $\pm$ 0.10 <sup>a</sup>  | <0.05          |
| Milk protein (g/day)                           | 1043.18 $\pm$ 28.37           | 1015.26 $\pm$ 25.91           | 943.47 $\pm$ 24.32            | >0.05          |
| Milk fat (g/100g)                              | 3.22 $\pm$ 0.06 <sup>c</sup>  | 3.58 $\pm$ 0.08 <sup>b</sup>  | 3.97 $\pm$ 0.07 <sup>a</sup>  | <0.05          |
| Milk fat (g/day)                               | 1106.98 $\pm$ 21.15           | 1115.32 $\pm$ 23.71           | 1049.86 $\pm$ 19.25           | >0.05          |
| Lactose (g/100g)                               | 5.26 $\pm$ 0.10 <sup>a</sup>  | 4.96 $\pm$ 0.10 <sup>b</sup>  | 4.66 $\pm$ 0.08 <sup>c</sup>  | <0.05          |
| Lactose (g/day)                                | 1808.62 $\pm$ 29.64           | 1544.27 $\pm$ 27.25           | 1235.16 $\pm$ 20.73           | <0.05          |
| Somatic cell count (SCC) (10 <sup>4</sup> /mL) | 24.03                         | 31.79                         | 46.98                         | -              |
| Somatic cell score (SCS)                       | 4.26 $\pm$ 0.01 <sup>c</sup>  | 4.67 $\pm$ 0.02 <sup>b</sup>  | 5.23 $\pm$ 0.01 <sup>a</sup>  | <0.05          |

Note: <sup>a, b, c</sup> =  $p < 0.05$  in the row (lactation days effect). The original data for SCC was transformed using  $SCS = \log_2 (SCC / 100,000) + 3$  for variance analysis reported as back-transformed
