# Supplementary material for: Short Time-Series Expression Transcriptome Data Reveal the Gene Expression Patterns of Dairy Cow Mammary Gland as Milk Yield Decreased Process
Source: MDPI journal article supplement (doi:10.3390/genes12060942), 2021-06-20
Supplement: s1 [file s1]

Table S4. Top 20 significantly enriched gene ontology (GO) terms in each category during peak and mid lactation.

| Category           | ID         | Term                                                     | P-value | Gene Name                                                                                                                                                                                                                                                                                                                                                                  | Number of Genes |
|--------------------|------------|----------------------------------------------------------|---------|----------------------------------------------------------------------------------------------------------------------------------------------------------------------------------------------------------------------------------------------------------------------------------------------------------------------------------------------------------------------------|-----------------|
| biological process | GO:2000026 | regulation of multicellular organismal development       | < 0.001 | HEYL, ADRB2, TMEM106B, MUSTN1, MMP9, TSPAN12, SYT1, MAPT, PI16, KITLG, TEK, TMEM100, CHI3L1, PPARG, DIO3, MEF2C, FKBP4, TNF, GPR4, IL34, MSX2, EGR1, THBS4, IL18, S1PR1, CXCL10, CTSK, ANGPT2, PPP1R16B, NFIB, CAV1, PIM1, C1QA, MT3, SCIN, ITM2C, TP53, GPR37L1, MYC, ZC3H12A, ADIPOQ, CITED2, TMEM98, SDC2, LTF, SEMA3C                                                  | 46              |
| biological process | GO:0072359 | circulatory system development                           | < 0.001 | HEYL, TSPAN12, PI16, TEK, TMEM100, CHI3L1, PPARG, GJA4, MEF2C, LOX, GPR4, MSX2, EGR1, THBS4, TGFBI, IL18, S1PR1, CXCL10, FAP, ANGPT2, CLIC4, ANGPTL4, ROM1, PPP1R16B, CAV1, PIM1, TP53, ACTA2, ZC3H12A, CITED2, CDH5, FHL2, B4GALT1, SEMA3C                                                                                                                                | 34              |
| biological process | GO:0051093 | negative regulation of developmental process             | < 0.001 | ADRB2, MMP9, MAPT, PI16, SLC6A4, TEK, PPARG, DIO3, FKBP4, TNF, GPR4, MSX2, THBS4, IL18, CXCL10, CTSK, ANGPT2, NFIB, CAV1, MT3, ITM2C, TP53, GPR37L1, MYC, ZC3H12A, ADIPOQ, TMEM98, LTF                                                                                                                                                                                     | 28              |
| biological process | GO:0001944 | vasculature development                                  | < 0.001 | TSPAN12, TEK, TMEM100, CHI3L1, PPARG, GJA4, MEF2C, LOX, GPR4, EGR1, THBS4, TGFBI, IL18, S1PR1, CXCL10, FAP, ANGPT2, CLIC4, ANGPTL4, ROM1, PPP1R16B, CAV1, ACTA2, ZC3H12A, CITED2, CDH5, B4GALT1, SEMA3C                                                                                                                                                                    | 28              |
| biological process | GO:0072358 | cardiovascular system development                        | < 0.001 | TSPAN12, TEK, TMEM100, CHI3L1, PPARG, GJA4, MEF2C, LOX, GPR4, EGR1, THBS4, TGFBI, IL18, S1PR1, CXCL10, FAP, ANGPT2, CLIC4, ANGPTL4, ROM1, PPP1R16B, CAV1, ACTA2, ZC3H12A, CITED2, CDH5, B4GALT1, SEMA3C                                                                                                                                                                    | 28              |
| biological process | GO:0042127 | regulation of cell proliferation                         | < 0.001 | PYCARD, MUSTN1, MMP9, CAV2, CORO1A, KITLG, CDCA7, PPARG, MEF2C, TNF, IL34, MSX2, EGR1, THBS4, IL18, S1PR1, CXCL10, FAP, DDAH1, RAC2, NDRG1, F2R, PPP1R16B, NFIB, PIM1, CCL5, SCIN, CNN1, CD320, TP53, GPR37L1, FABP4, MYC, CLU, ADIPOQ, CCL2, EPCAM, B4GALT1, LTF                                                                                                          | 39              |
| biological process | GO:0050793 | regulation of developmental process                      | < 0.001 | HEYL, ADRB2, TMEM106B, MUSTN1, MMP9, TSPAN12, SYT1, CD44, MAPT, PI16, SLC6A4, CORO1A, KITLG, TEK, BSP5, TMEM100, CHI3L1, PPARG, DIO3, MEF2C, FKBP4, TNF, GPR4, IL34, MSX2, EGR1, THBS4, IL18, S1PR1, CXCL10, CTSK, ANGPT2, RSL1D1, PPP1R16B, NFIB, CAV1, PIM1, C1QA, MT3, SCIN, ITM2C, TP53, GPR37L1, MEDAG, MYC, ZC3H12A, ADIPOQ, CITED2, CCL2, TMEM98, SDC2, LTF, SEMA3C | 53              |
| biological process | GO:0010942 | positive regulation of cell death                        | < 0.001 | PYCARD, MMP9, MAPT, PPARG, MEF2C, TNF, MSX2, FAP, F2R, CAV1, C1QA, MT3, CCL5, SCIN, KCNMA1, ITM2C, TP53, MYC, CLU, ZC3H12A, ADIPOQ, CCL2, S100A9, B4GALT1                                                                                                                                                                                                                  | 24              |
| biological process | GO:0009888 | tissue development                                       | < 0.001 | HEYL, ADRB2, MUSTN1, MMP9, CAV2, ZNF750, SLC44A4, CD44, PI16, KITLG, TMEM100, PPARG, ACTG2, MEF2C, TNF, GPR4, MSX2, EGR1, CFL2, S1PR1, CXCL10, CTSK, ARRDC3, CLIC4, PPP1R16B, NFIB, CAV1, PIM1, SCIN, ANXA2, KCNMA1, TP53, ACTA2, ADIPOQ, CITED2, ASCL2, CLEC3B, SPP1, FHL2, B4GALT1, LTF, SEMA3C, C15H11orf34                                                             | 43              |
| biological process | GO:0001568 | blood vessel development                                 | < 0.001 | TSPAN12, TEK, TMEM100, CHI3L1, PPARG, GJA4, MEF2C, LOX, GPR4, EGR1, THBS4, TGFBI, IL18, S1PR1, CXCL10, FAP, ANGPT2, ANGPTL4, PPP1R16B, CAV1, ACTA2, ZC3H12A, CITED2, CDH5, B4GALT1, SEMA3C                                                                                                                                                                                 | 26              |
| biological process | GO:0048646 | anatomical structure formation involved in morphogenesis | < 0.001 | HEYL, MMP9, TSPAN12, SLC44A4, TEK, TMEM100, CHI3L1, PPARG, MEF2C, TNF, GPR4, MSX2, CFL2, THBS4, TGFBI, IL18, S1PR1, CXCL10, FAP, ANGPT2, ANGPTL4, PPP1R16B, CAV1, PIM1, TP53, ACTA2, ZC3H12A, CITED2, FHL2, B4GALT1, SEMA3C                                                                                                                                                | 31              |

|                    |            |                                                         |         |                                                                                                                                                                                                                                                                                                                                                                           |    |
|--------------------|------------|---------------------------------------------------------|---------|---------------------------------------------------------------------------------------------------------------------------------------------------------------------------------------------------------------------------------------------------------------------------------------------------------------------------------------------------------------------------|----|
| biological process | GO:0051241 | negative regulation of multicellular organismal process | < 0.001 | PYCARD, ADRB2, MMP9, PI16, SLC6A4, TEK, PPARG, DIO3, MEF2C, FKBP4, TNF, GPR4, MSX2, THBS4, CXCL10, CTSK, ARRDC3, ANGPT2, ADORA2B, F2R, NFIB, MT3, KCNMA1, ITM2C, TP53, GPR37L1, MYC, ZC3H12A, PROS1, ADIPOQ, TMEM98, LTF                                                                                                                                                  | 32 |
| biological process | GO:0048468 | cell development                                        | < 0.001 | HEYL, NEFM, TMEM106B, CAV2, SYT1, SLC44A4, MAPT, PI16, KITLG, TEK, BSP5, PPARG, DIO3, MEF2C, FKBP4, TNF, GPR4, IL34, MSX2, CFL2, CLIC4, NDRG1, PPP1R16B, NFIB, C1QA, MT3, NRROS, KCNMA1, ITM2C, FERMT3, TP53, GPR37L1, ACTA2, ADIPOQ, CITED2, TMEM98, DEFB1, SDC2, FHL2, B4GALT1, LTF, SEMA3C                                                                             | 42 |
| biological process | GO:0008283 | cell proliferation                                      | < 0.001 | PYCARD, MUSTN1, MMP9, CAV2, TSPAN1, CORO1A, KITLG, TEK, CDCA7, PPARG, MEF2C, TNF, IL34, MSX2, EGR1, THBS4, TGFB1, IL18, S1PR1, CXCL10, FAP, CKS2, DDAH1, RAC2, NDRG1, F2R, PPP1R16B, NFIB, PIM1, CCL5, SCIN, CNN1, CD320, TP53, GPR37L1, FABP4, MYC, CLU, ADIPOQ, CCL2, EPCAM, B4GALT1, LTF                                                                               | 43 |
| biological process | GO:0009653 | anatomical structure morphogenesis                      | < 0.001 | HEYL, TMEM106B, MMP9, TSPAN12, SYT1, SLC44A4, CD44, MAPT, SLC6A4, CORO1A, TEK, TMEM100, CHI3L1, PPARG, ACTG2, DIO3, MEF2C, LOX, TNF, GPR4, MSX2, CFL2, THBS4, TGFB1, IL18, S1PR1, CXCL10, ATP6V1B1, FAP, ANGPT2, CLIC4, ANGPTL4, ROM1, PPP1R16B, NFIB, CAV1, PIM1, MT3, FERMT3, TP53, ACTA2, ZC3H12A, ADIPOQ, CITED2, CCL2, SDC2, FHL2, B4GALT1, LTF, SEMA3C, C15H11orf34 | 51 |
| biological process | GO:0008284 | positive regulation of cell proliferation               | < 0.001 | PYCARD, MUSTN1, MMP9, CAV2, CORO1A, KITLG, MEF2C, TNF, IL34, EGR1, THBS4, IL18, S1PR1, RAC2, F2R, PPP1R16B, PIM1, CCL5, CD320, GPR37L1, FABP4, MYC, EPCAM, B4GALT1, LTF                                                                                                                                                                                                   | 25 |
| biological process | GO:0043065 | positive regulation of apoptotic process                | < 0.001 | PYCARD, MMP9, PPARG, MEF2C, TNF, MSX2, FAP, F2R, CAV1, CCL5, SCIN, KCNMA1, ITM2C, TP53, MYC, CLU, ZC3H12A, ADIPOQ, CCL2, S100A9, B4GALT1                                                                                                                                                                                                                                  | 21 |
| biological process | GO:0043068 | positive regulation of programmed cell death            | < 0.001 | PYCARD, MMP9, PPARG, MEF2C, TNF, MSX2, FAP, F2R, CAV1, CCL5, SCIN, KCNMA1, ITM2C, TP53, MYC, CLU, ZC3H12A, ADIPOQ, CCL2, S100A9, B4GALT1                                                                                                                                                                                                                                  | 21 |
| biological process | GO:0051240 | positive regulation of multicellular organismal process | < 0.001 | PYCARD, HEYL, ADRB2, TMEM106B, MUSTN1, MMP9, SYT1, MAPT, KITLG, TEK, BSP5, TMEM100, CHI3L1, DIO3, MEF2C, TNF, IL34, MSX2, EGR1, IL18, ADORA2B, F2R, PPP1R16B, CAV1, PIM1, C1QA, SCIN, CYBA, GPR37L1, ZC3H12A, FABP5, ADIPOQ, CITED2, AGPAT1, UCP2, TLR3, LTF, SEMA3C                                                                                                      | 38 |
| biological process | GO:0072593 | reactive oxygen species metabolic process               | < 0.001 | NOS3, MAPT, TNF, VAV1, SOD2, DDAH1, TMEM106A, CAV1, MT3, NRROS, CYBA, TP53, NCF1, ZC3H12A                                                                                                                                                                                                                                                                                 | 14 |
| cellular component | GO:0045177 | apical part of cell                                     | < 0.001 | ADRB2, CLIC5, SLC1A1, SLC44A4, CD44, SLC6A4, TEK, ATP6V0D2, SCNN1A, ATP6V1B1, FAP, CLIC4, SLC2A5, REEP6, KCNMA1, CD300LG, S100G, SCNN1G, C15H11orf34                                                                                                                                                                                                                      | 19 |
| cellular component | GO:0016324 | apical plasma membrane                                  | < 0.001 | ADRB2, CLIC5, SLC1A1, SLC44A4, CD44, SLC6A4, TEK, ATP6V0D2, SCNN1A, ATP6V1B1, SLC2A5, KCNMA1, CD300LG, S100G, SCNN1G, C15H11orf34                                                                                                                                                                                                                                         | 16 |
| cellular component | GO:0044459 | plasma membrane part                                    | < 0.001 | NOS3, ADRB2, CLIC5, CAV2, SLC1A1, TSPAN12, SYT1, SLC44A4, KCNJ2, CD44, MAPT, LIPE, SLC6A4, CORO1A, GJB1, TEK, ATP6V0D2, GJA4, TNF, RHBG, S1PR1, CXCL10, SCNN1A, ATP6V1B1, FAP, SLC8A1, SLC16A1, SLC2A5, ROM1, F2R, CAV1, KCNMA1, CD300LG, CD320, CYBA, GPR37L1, NCF1, S100G, FABP5, SCNN1G, LRRC8C, EPCAM, CLDN4, B4GALT1, RAB26, C15H11orf34                             | 46 |
| cellular component | GO:0098590 | plasma membrane region                                  | < 0.001 | NOS3, ADRB2, CLIC5, CAV2, SLC1A1, SYT1, SLC44A4, CD44, MAPT, LIPE, SLC6A4, TEK, ATP6V0D2, RHBG, SCNN1A, ATP6V1B1, FAP, SLC8A1, SLC2A5, ROM1, F2R, CAV1, KCNMA1, CD300LG, GPR37L1, S100G, FABP5, SCNN1G, CLDN4, B4GALT1, C15H11orf34                                                                                                                                       | 31 |
| cellular component | GO:0005901 | caveola                                                 | < 0.001 | NOS3, CAV2, LIPE, SLC8A1, F2R, CAV1, KCNMA1                                                                                                                                                                                                                                                                                                                               | 7  |

|                    |            |                                        |         |                                                                                                                                                                                                                                                      |    |
|--------------------|------------|----------------------------------------|---------|------------------------------------------------------------------------------------------------------------------------------------------------------------------------------------------------------------------------------------------------------|----|
| cellular component | GO:0044421 | extracellular region part              | < 0.001 | <i>PRSS2, MMP9, RNASE6, KITLG, BSP5, CHI3L1, TNF, IL34, THBS4, IL18, ELN, SCNN1A, SERPINA5, FAP, ANGPT2, SERPINA3-1, ANGPTL4, CSN1S2, PTGDS, ANXA2, KCNMA1, APOE, CLU, FABP5, ADIPOQ, CMTM8, TMEM98, DEFB1, CLEC3B, COL12A1, B4GALT1, LTF, LTBP2</i> | 33 |
| cellular component | GO:0005615 | extracellular space                    | < 0.001 | <i>PRSS2, MMP9, RNASE6, KITLG, BSP5, CHI3L1, TNF, IL34, THBS4, IL18, SCNN1A, SERPINA5, FAP, ANGPT2, SERPINA3-1, ANGPTL4, CSN1S2, PTGDS, KCNMA1, APOE, CLU, FABP5, ADIPOQ, CMTM8, TMEM98, CLEC3B, B4GALT1, LTF</i>                                    | 28 |
| cellular component | GO:0044853 | plasma membrane raft                   | < 0.001 | <i>NOS3, CAV2, LIPE, SLC8A1, F2R, CAV1, KCNMA1</i>                                                                                                                                                                                                   | 7  |
| cellular component | GO:0098858 | actin-based cell projection            | 0.001   | <i>CD44, KITLG, TEK, ACTG2, USH1C, ATP6V1B1, CLIC4, ACTA2, B4GALT1</i>                                                                                                                                                                               | 9  |
| cellular component | GO:0045121 | membrane raft                          | 0.001   | <i>NOS3, CAV2, MAPT, LIPE, SLC6A4, TEK, TNF, S1PR1, SLC8A1, F2R, CAV1, KCNMA1</i>                                                                                                                                                                    | 12 |
| cellular component | GO:0098857 | membrane microdomain                   | 0.001   | <i>NOS3, CAV2, MAPT, LIPE, SLC6A4, TEK, TNF, S1PR1, SLC8A1, F2R, CAV1, KCNMA1</i>                                                                                                                                                                    | 12 |
| cellular component | GO:0009986 | cell surface                           | 0.002   | <i>TYROBP, TEK, TNF, S1PR1, CXCL10, FAP, CLIC4, TNS1, NRROS, KCNMA1, ADRA2B, ADIPOQ, B4GALT1, LTF</i>                                                                                                                                                | 14 |
| cellular component | GO:0098589 | membrane region                        | 0.002   | <i>NOS3, CAV2, MAPT, LIPE, SLC6A4, TEK, TNF, S1PR1, SLC8A1, F2R, CAV1, KCNMA1</i>                                                                                                                                                                    | 12 |
| cellular component | GO:0005581 | collagen trimer                        | 0.003   | <i>C1QA, COLEC12, C1QTNF9, C1QB, ADIPOQ, COL12A1</i>                                                                                                                                                                                                 | 6  |
| cellular component | GO:0031226 | intrinsic component of plasma membrane | 0.004   | <i>SLC1A1, TSPAN12, KCNJ2, SLC6A4, TNF, RHBG, S1PR1, SCNN1A, SLC8A1, SLC16A1, SLC2A5, KCNMA1, CD320, CYBA, NCF1, LRRC8C, CLDN4, RAB26</i>                                                                                                            | 18 |
